# Supplementary material
Source: MDPI journal article supplement (https://www.mdpi.com/2072-4292/16/10/1686)
Supplement: s1 [file s1]

## Supplementary Materials

### 1. Supplementary data to Figure 8

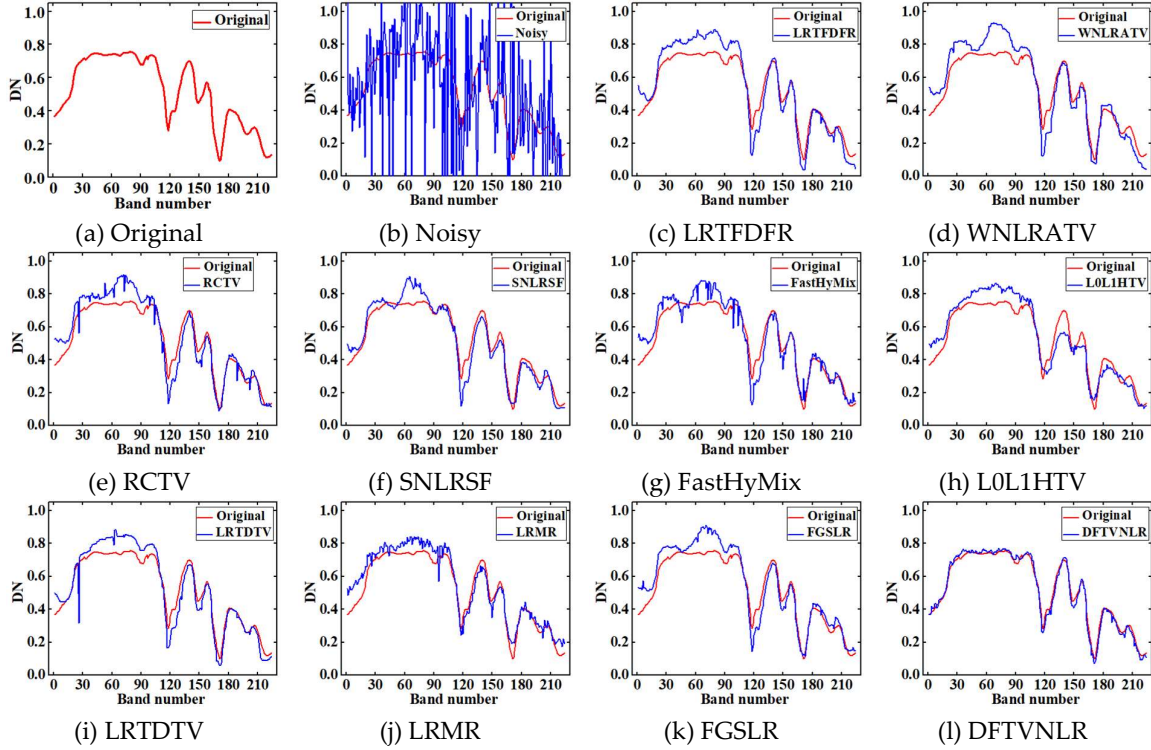

**Figure S1.** The spectral curves at spatial location (30, 30) of the Indian Pine dataset under noise Case 3 by different compared methods. (a) Original, (b) Noisy, (c) LRTFDFR, (d) WNLRTV, (e) RCTV, (f) SNLRSF, (g) FastHyMix, (h) L0L1HTV, (i) LRTDTV, (j) LRMR, (k) FGSLR, (l) DFTVNLR (proposed).

## 2. Supplementary data to Figure 9

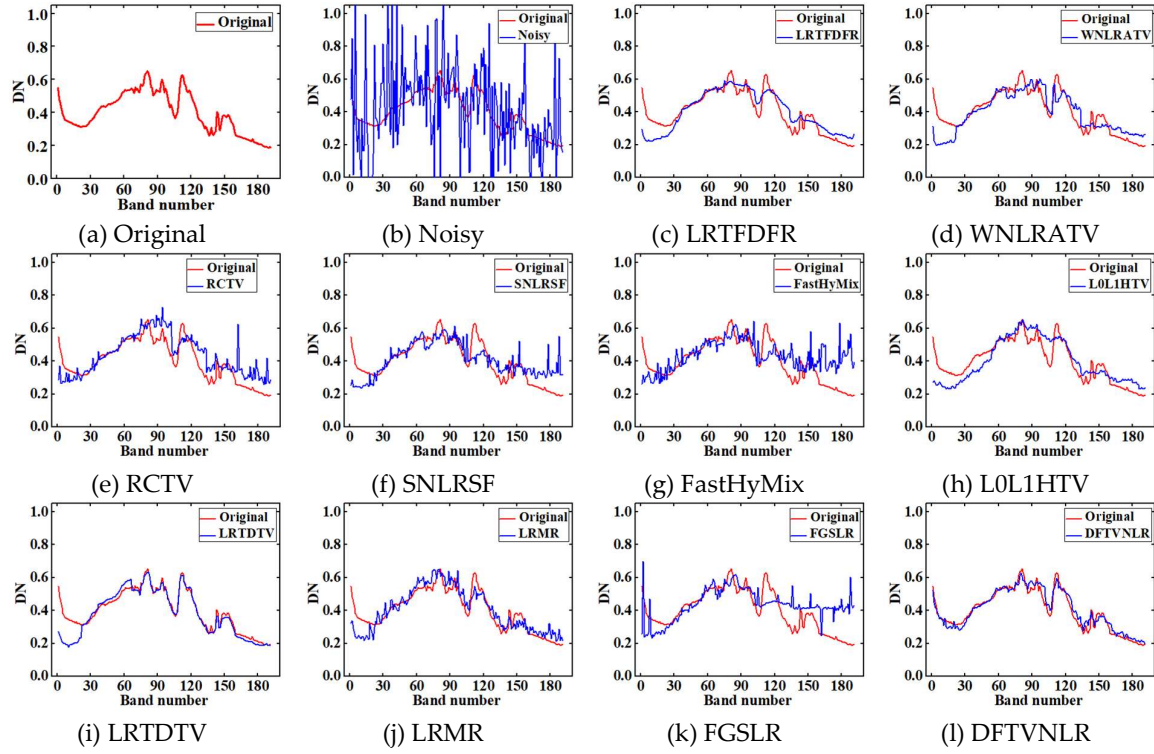

**Figure S2.** The spectral curves at spatial location (151, 151) of the WDC Mall dataset under noise Case 4 by different compared methods. (a) Original, (b) Noisy, (c) LRTFDFR, (d) WNLRTV, (e) RCTV, (f) SNLRSF, (g) FastHyMix, (h) L0L1HTV, (i) LRTDTV, (j) LRM, (k) FGSLR, (l) DFTVNLR (proposed).
